# Supplementary material
Source: PubMed Central journal article supplement (PMC10141269)
Supplement: jamaophthalmol-e231144-s001.pdf [file jamaophthalmol-e231144-s001.pdf]

## Supplemental Online Content

Mihalache A, Popovic MM, Muni RH. Performance of an artificial intelligence chatbot in ophthalmic knowledge assessment. *JAMA Ophthalmol*. Published online April 27, 2023. doi:10.1001/jamaophthalmol.2023.1144

**eFigure.** Sample entry of multiple-choice question from OphthoQuestions OKAPS/WQE trial into ChatGPT on January 9th, 2023

This supplemental material has been provided by the authors to give readers additional information about their work.

## Question from *Clinical Optics* category on OphthoQuestions

What is the typical distance from the retina to the nodal point in the reduced schematic eye?

- A. 1 cm
- B. 1.7 cm
- C. 1.7 mm
- D. 5.5 mm

### ChatGPT's output

C. 1.7 mm is the typical distance from the retina to the nodal point in the reduced schematic eye.
