# Supplementary material
Source: PubMed Central journal article supplement (PMC10141269)
Supplement: jamaophthalmol-e231144-s002.pdf [file jamaophthalmol-e231144-s002.pdf]

## Data Sharing Statement

Mihalache. Performance of an Artificial Intelligence Chatbot in Ophthalmic Knowledge Assessment. *JAMA Ophthalmol*. Published April 27, 2023.

doi:10.1001/jamaophthalmol.2023.1144

### Data

**Data available:** Yes

**Data types:** Data (not involving human participants)

**How to access data:** Data requests are to be directed to [amihalac@uwo.ca](mailto:amihalac@uwo.ca).

**When available:** With publication

### Supporting Documents

**Document types:** None

### Additional Information

**Who can access the data:** Additional data will be made available to anyone requesting the data.

**Types of analyses:** Data will be made available for any purposes, upon request.

**Mechanisms of data availability:** Data will be made available with investigator support.
